# Supplementary material for: Afatinib induces apoptosis in NSCLC without EGFR mutation through Elk-1-mediated suppression of CIP2A
Source: PubMed Central journal article supplement (PMC4385843; doi:10.18632/oncotarget.2941), 2014-12-11
Supplement: oncotarget-06-2164-s001.pdf [file oncotarget-06-2164-s001.pdf]

## Afatinib induces apoptosis in NSCLC without EGFR mutation through Elk-1-mediated suppression of CIP2A

### Supplementary Material

#### Table

Characteristic of the NSCLC cell lines used in this study with different mutation status<sup>a</sup>.

| Cell line | Subtype              | <i>EGFR</i> | <i>HER2</i> | <i>KRAS</i> | <i>BRAF</i> | <i>PIK3CA</i> | <i>TP53</i> | <i>PTEN</i> |
|-----------|----------------------|-------------|-------------|-------------|-------------|---------------|-------------|-------------|
| A549      | Adenocarcinoma       | Wild        | Wild        | G12S        | Wild        | Wild          | Wild        | Wild        |
| H460      | Large cell carcinoma | Wild        | Wild        | Q61H        | Wild        | E545K         | Wild        | Wild        |
| H358      | Adenocarcinoma       | Wild        | Wild        | G12C        | Wild        | Wild          | Null        | Wild        |
| H441      | Adenocarcinoma       | Wild        | Wild        | G12V        | Wild        | Wild          | R158L       | Wild        |

*Abbreviations:* *EGFR*, epidermal growth factor receptor; *HER2*, human epidermal growth factor receptor 2; *KRAS*, Kirsten rat sarcoma viral oncogene homolog; *BRAF*, *PIK3A*, phosphoinositide-3-kinase, catalytic, alpha polypeptide; *TP53*, tumor protein *p53*; *PTEN*, phosphatase and tensin homolog.

<sup>a</sup>This table was modified from Rikova K *et al.* (*Cell* 2007; 131:1190-1203)

Supplemental Data

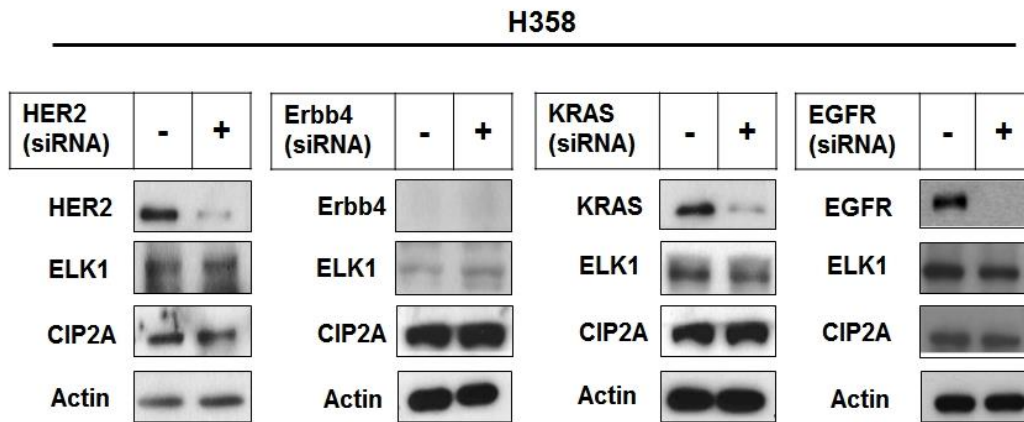

**Figure S1:** Knockdown of ErbB family and KRAS genes in afatinib-sensitive (H358) cells.

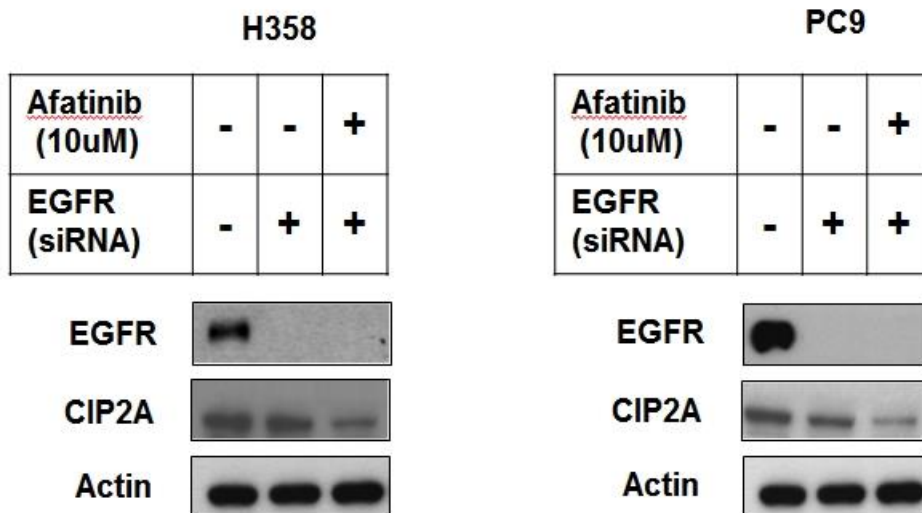

**Figure S2:** Knockdown of EGFR and combines with afatinib in afatinib-sensitive (H358) cells and PC9 (EGFR mutation) cells.
